# Supplementary material for: Ethylene-Cytokinin Interaction Determines Early Defense Response of Wheat against Stagonospora nodorum Berk
Source: PubMed Central journal article supplement (PMC7911247; doi:10.3390/biom11020174), 2021-01-28
Supplement: biomolecules-11-00174-s001.pdf [file biomolecules-11-00174-s001.pdf]

**Supplementary Materials**

**Table S1. Primers used for qPCR.**

| <b>Genes</b>    | <b>Forward primers (5'→3')</b>    | <b>Reverse primers (5'→3')</b>    |
|-----------------|-----------------------------------|-----------------------------------|
| <i>TaACSI</i>   | gag gtt gtg aac gag cta gaa g     | ctc gaa acc ctg caa gag ata g     |
| <i>TaACO</i>    | tgt cca tgg cct cct tct a         | cga aca cga acc ttg ggt at        |
| <i>TaEIL1</i>   | ggc tca aca acc tgg att tt        | ccc tgt cca aag aaa ccc t         |
| <i>TaPIE1</i>   | aca cat gcc gac gaa tct ac        | ccg agt tca aac cca aat tca c     |
| <i>TRbohD</i>   | acc acc aga cca gac aga c         | tgg ttg gat agg agg cgt ag        |
| <i>TaRbohF</i>  | tgg cac ccc ttc tca att ac        | ctc tcg tgt cca gtc acc aa        |
| <i>Ta PR1-4</i> | ata acc tgg gcg tct tca tc        | gct tat tac ggc att cct ttt       |
| <i>Ta PR2</i>   | gcg tga agg tgg tga ttt           | gtg ccc gtt aca ctt gga t         |
| <i>TaIPT2</i>   | att cgt aca tgg gtg ttc cta tac   | aat tgt tgg tac gta ggt gga g     |
| <i>TaIPT5</i>   | cga act agc tgt cat gcc ata g     | aga gct tga ccg tag cag ta        |
| <i>TaZOG2-1</i> | cct gca tgt cca agg agt tcc tc    | gaa gga cac gta gag cac cga ct    |
| <i>TaGLU1-1</i> | aat aac aac gca acg gtg aca gtt a | gat ccc gac gac atg caa aca       |
| <i>TaGLI4</i>   | acg tga cgg tcg acg agt acc ata   | tct cca aac acc ttg aag cag aac t |
| <i>TaCKX1</i>   | gga ggt ggc gct gga caa gat c     | gca gaa ccg cag tat ctt ctg gt    |
| <i>TaRR21</i>   | tca acc agt cag cct ttc at        | tag agc cca ttc cca tag ag        |
| <i>TaWRKY13</i> | gag gag gaa cat gag cag aag       | gaa cca ccc gaa gtc gaa g         |
| <i>TaRLI</i>    | ttg-agc-aac-tca-tgg-acc-ag        | gct-ttc-caa-ggc-aca-aac-at        |

**Table S2. The lists of orthologous genes used in this work.**

| <b>Genes</b>    | <b>Accession numbers</b> | <b>Orthologs</b> | <b>Accession numbers</b> | <b>References</b>              |
|-----------------|--------------------------|------------------|--------------------------|--------------------------------|
| <i>TaACS1</i>   | U35779                   | <i>OsACS6</i>    | AK065212                 | Subramaniam et al., 1996       |
| <i>TaACO</i>    | KF900072                 | <i>AtACO</i>     | NM_127517                | Zhang et al., 2019             |
| <i>TaEIL1</i>   | KU030837                 | <i>AtEIN3</i>    | NM_112968                | Duan et al., 2013              |
| <i>TaPIE1</i>   | EF583940                 | <i>AtERF1</i>    | NM_113225                | Zhu et al., 2014               |
| <i>TRbohD</i>   | AK335454                 | <i>AtRbohD</i>   | NM_124165                | Dmochowska-Boguta et al., 2013 |
| <i>TaRbohF</i>  | AY561153                 | <i>AtRbohF</i>   | NM_105079                | Dmochowska-Boguta et al., 2013 |
| <i>TaPR1-4</i>  | KF196278                 | <i>AtPR1</i>     | NM_127025                | Lu et al., 2011                |
| <i>TaPR2</i>    | DQ090946                 | <i>AtBGL2</i>    | NM_115586                | Lu et al., 2011                |
| <i>TaIPT2</i>   | JN128577                 | <i>ZmIPT2</i>    | ABY78882                 | Song et al., 2012              |
| <i>TaIPT5</i>   | JN128579                 | <i>ZmIPT5</i>    | NP001121194              | Song et al., 2012              |
| <i>TaZOG2-1</i> | JN128594                 | <i>ZmcZOG2</i>   | Q8RXA5                   | Song et al., 2012              |
| <i>TaGLU1-1</i> | JN128599                 | <i>ZmGLU2</i>    | ACG24271                 | Song et al., 2012              |
| <i>TaGLU4</i>   | JN128604                 | <i>HvGLU</i>     | ACF07988                 | Song et al., 2012              |
| <i>TaCKX1</i>   | JN128583                 | <i>ZmCKX1</i>    | NP001105591              | Song et al., 2012              |
| <i>TaRR21</i>   | JF951927                 | <i>AtRR2</i>     | NM117704                 | Zhang et al., 2012             |
| <i>TaWRKY13</i> | EF397614                 | <i>AtWRKY70</i>  | NM_115498                | Wu et al., 2008                |

Dmochowska-Boguta M., Nadolska-Orczyk A., Orczyk W. Roles of peroxidases and NADPH oxidases in the oxidative response of wheat (*Triticum aestivum*) to brown rust (*Puccinia triticina*) infection // *Plant Pathology*. 2013. 62, 993–1002. doi: 10.1111/ppa.12009.

Duan X., Wang X., Fu Y., Tang Ch., Li X., Cheng Y., Feng H., Huang L., Kang Zh. *TaEIL1*, a wheat homologue of *AtEIN3*, acts as a negative regulator in the wheat–stripe rust fungus interaction // *Mol Plant Pathol*. 2013. 14(7): 728–739. doi: 10.1111/mpp.12044.

Lu Sh., Friesen T.L., Faris J.D. Molecular characterization and genomic mapping of the pathogenesis-related protein 1 (PR-1) gene family in hexaploid wheat (*Triticum aestivum* L.) // *Molecular Genetics and Genomics*. 2011. 285.

Song J., Jiang L., Jameson P.E. Co-ordinate regulation of cytokinin gene family members during flag leaf and reproductive development in wheat // *BMC Plant Biol*. 2012. 6; 12:78. doi: 10.1186/1471-2229-12-78.

Subramaniam K., Abbo Sh. and Ueng P. P. Isolation of two differentially expressed wheat ACC synthase cDNAs and the characterization of one of their genes with root-predominant expression // *Plant Molecular Biology* 1996. 31. 1009-1020. doi: 10.1007/bf00040719.

Wu H., Ni Zh., Yao Y., Guo G., Sun Q. Cloning and expression profiles of 15 genes encoding WRKY transcription factor in wheat (*Triticum aestivum* L.) // Progress in Natural Science. 2008. 18(6). doi:10.1016/j.pnsc.2007.12.006.

Zhang, L., Zhao G., Jia J., Liu X. and Kong X. Molecular characterization of 60 isolated wheat MYB genes and analysis of their expression during abiotic stress // J. Exp. Bot. 63 (1), 203-214 (2012). doi: 10.1093/jxb/err264.

Zhang, S., Gan, Y. & Xu, B. Mechanisms of the IAA and ACC-deaminase producing strain of *Trichoderma longibrachiatum* T6 in enhancing wheat seedling tolerance to NaCl stress. BMC Plant Biol 19, 22 (2019). <https://doi.org/10.1186/s12870-018-1618-5>

Zhu X., Qi L., Liu X., Cai Sh., Xu H., Huang R., Li J., Wei X., Zhang Z. The Wheat Ethylene Response Factor Transcription Factor PATHOGEN-INDUCED ERF1 Mediates Host Responses to Both the Necrotrophic Pathogen *Rhizoctonia cerealis* and Freezing Stresses // Plant Physiol. 2014. 164(3): 1499–1514. doi: 10.1104/pp.113.229575.
